# Supplementary material for: Fear of heights in virtual reality saturates 20 to 40 m above ground
Source: Springer Nature journal article supplement (doi:10.1007/s00415-019-09370-5), 2019-05-17
Supplement: MOESM1 [file 16731502]

| **subject** | **age (years)** | **gender** | **vHISS** | **acrophobia** |
| --- | --- | --- | --- | --- |
|  |  |  |  |  |
|  |  |  |  |  |
| 1 | 30 | f | 1 | no |
| 2 | 31 | m | 5 | no |
| 3 | 27 | f | 4 | no |
| 4 | 25 | f | 6 | yes |
| 5 | 33 | m | 0 | no |
| 6 | 32 | m | 0 | no |
| 7 | 68 | f | 4 | yes |
| 8 | 35 | f | 10 | no |
| 9 | 70 | m | 6 | yes |
| 10 | 71 | m | 5 | no |
| 11 | 55 | f | 6 | no |
| 12 | 56 | f | 8 | yes |
| 13 | 51 | f | 7 | yes |
| 14 | 69 | f | 7 | yes |
| 15 | 50 | f | 11 | yes |
| 16 | 53 | f | 7 | yes |
| 17 | 57 | f | 9 | yes |
| 18 | 64 | f | 6 | yes |
| 19 | 70 | m | 6 | no |
| 20 | 50 | m | 8 | no |
| 21 | 60 | f | 8 | yes |
| 22 | 72 | f | 8 | yes |
| 23 | 72 | f | 7 | yes |
|  |  |  |  |  |
|  |  |  |  |  |
| **mean** | 52.2 |  | 6.0 |  |
| **SD** | 16.4 |  | 2.8 |  |

**Table 1: Study cohort characteristics**

*vHISS – visual height intolerance severity scale (maximum: 13 points)*
